# Supplementary material for: Understanding the determinants of infant and under-five mortality rates: a multivariate decomposition analysis of Demographic and Health Surveys in Ghana, 2003, 2008 and 2014
Source: PubMed Central journal article supplement — BMJ Glob Health. 2019 Jul 9;4(4):e001658. doi: 10.1136/bmjgh-2019-001658 (PMC6626520; doi:10.1136/bmjgh-2019-001658), 2019-07-09
Supplement: bmjgh-2019-001658supp001.pdf [file bmjgh-2019-001658supp001.pdf]

Supplemental materials for the manuscript “A multivariate decomposition analysis of the determinants of infant and under-five mortality rates in Ghana: Evidence from 2003, 2008 and 2014 Demographic and Health Surveys”

Table S1: Summary of Ghana Demographic and Health Survey data sets included in the analysis.

| Survey year | The reference period for five-year mortality estimates | Women response rate | Number of women age 15-49 years interviewed | The population of women aged 15-49 years at the time of the survey | Number of live births, five years preceding the interview |
|-------------|--------------------------------------------------------|---------------------|---------------------------------------------|--------------------------------------------------------------------|-----------------------------------------------------------|
| 2003        | 1999-2003                                              | 95.7                | 5691                                        | 4170068                                                            | 3844                                                      |
| 2008        | 2004-2008                                              | 96.5                | 4916                                        | 4891557                                                            | 2992                                                      |
| 2014        | 2010-2014                                              | 97.3                | 9396                                        | 5655156                                                            | 5884                                                      |

Table S2: The trend in select characteristics of the household that could have influenced Infant mortality, among children born in the five years preceding the survey, Ghana 2003, 2008, and 2014.

| Characteristics of the households                   | 2003 GDHS   | 2008 GDHS   | 2014 GDHS   | Overall     |
|-----------------------------------------------------|-------------|-------------|-------------|-------------|
|                                                     | %           | %           | %           | %           |
| <b>Sex of household head</b>                        |             |             |             |             |
| Male                                                | 73.3        | 72.4        | 74.3        | 73.4        |
| Female                                              | 26.7        | 27.6        | 25.7        | 26.6        |
| <b>Age of household head [Mean ± SD]</b>            | 41.5 ± 13.8 | 39.7 ± 12.7 | 39.6 ± 12.0 | 40.2 ± 12.8 |
| <b>Place</b>                                        |             |             |             |             |
| Urban                                               | 33.1        | 37.9        | 45.0        | 39.2        |
| Rural                                               | 66.9        | 62.1        | 55.0        | 60.8        |
| <b>Region</b>                                       |             |             |             |             |
| Western                                             | 10.1        | 9.3         | 10.1        | 9.8         |
| Central                                             | 8.4         | 10.1        | 10.9        | 9.9         |
| Greater Accra Central                               | 10.7        | 11.9        | 15.5        | 12.9        |
| Volta                                               | 8.2         | 8.4         | 7.7         | 8.1         |
| Eastern                                             | 10.0        | 8.8         | 9.4         | 9.3         |
| Ashanti                                             | 18.8        | 18.7        | 18.7        | 18.7        |
| Brong Ahafo                                         | 11.0        | 9.3         | 8.7         | 9.6         |
| Northern                                            | 13.7        | 15.7        | 12.5        | 13.9        |
| Upper East                                          | 5.9         | 5.1         | 4.0         | 4.9         |
| Upper West                                          | 3.2         | 2.8         | 2.7         | 2.9         |
| <b>Wealth</b>                                       |             |             |             |             |
| Poorest                                             | 25.9        | 25.6        | 22.2        | 24.4        |
| Poorer                                              | 22.2        | 22.0        | 21.0        | 21.7        |
| Middle                                              | 19.8        | 18.9        | 19.6        | 19.4        |
| Richer                                              | 16.9        | 19.3        | 18.9        | 18.4        |
| Richest                                             | 15.1        | 14.3        | 18.4        | 16.1        |
| <b>Household</b>                                    |             |             |             |             |
| <5 residents                                        | 34.1        | 37.1        | 37.2        | 36.2        |
| 5-7 residents                                       | 43.6        | 43.4        | 46.2        | 44.5        |
| 8+ residents                                        | 22.3        | 19.6        | 16.6        | 19.2        |
| <b>Household access to an improved water source</b> |             |             |             |             |
| Improved                                            | 75.9        | 86.0        | 89.5        | 84.3        |
| Not improved                                        | 24.1        | 14.0        | 10.5        | 15.7        |
| <b>Household access to improved toilet</b>          |             |             |             |             |
| Improved not shared                                 | 9.6         | 7.5         | 11.5        | 9.6         |
| Improved shared                                     | 59.2        | 53.1        | 55.2        | 55.7        |
| Not improved                                        | 29.6        | 38.2        | 33.0        | 33.7        |
| Missing                                             | 1.6         | 1.2         | 0.3         | 1.0         |

% represents column percentages, SD: Standard deviation.

Table S3: The trend in select characteristics of the mother that could have influenced Infant mortality, among children born in the five years preceding the survey, Ghana 2003, 2008, and 2014

| Characteristics of the mother        | 2003 GDHS  | 2008 GDHS  | 2014 GDHS  | Overall    |
|--------------------------------------|------------|------------|------------|------------|
|                                      | %          | %          | %          | %          |
| <b>Mother's age at child's birth</b> |            |            |            |            |
| Mean ± SD                            | 30.4 ± 7.1 | 30.0 ± 7.0 | 30.5 ± 6.8 | 30.3 ± 6.9 |
| <18                                  | 26.2       | 26.1       | 24.3       | 25.5       |
| 18 - 34                              | 73.5       | 73.6       | 75.1       | 74.1       |
| 35 +                                 | 0.3        | 0.3        | 0.6        | 0.4        |
| <b>Marital status</b>                |            |            |            |            |
| Never married                        | 3.0        | 4.9        | 7.7        | 5.4        |
| Currently married                    | 90.2       | 89.5       | 85.7       | 88.2       |
| Formerly married                     | 6.8        | 5.6        | 6.7        | 6.4        |
| <b>Educational attainment</b>        |            |            |            |            |
| None                                 | 40.3       | 32.7       | 27.4       | 32.9       |
| Primary                              | 23.2       | 24.8       | 20.0       | 22.5       |
| Secondary                            | 35.4       | 40.1       | 48.1       | 41.8       |
| Tertiary                             | 1.1        | 2.4        | 4.5        | 2.8        |
| <b>Body mass index</b>               |            |            |            |            |
| Underweight                          | 8.2        | 7.1        | 2.3        | 5.6        |
| Normal                               | 64.5       | 63.2       | 28.2       | 50.2       |
| Overweight                           | 15.8       | 21.0       | 13.1       | 16.5       |
| Obese                                | 6.9        | 7.4        | 7.6        | 7.4        |
| Missing                              | 4.6        | 1.3        | 48.7       | 20.3       |

% represents column percentages, SD: Standard deviation

Table S4: The trend in select characteristics of the child that could have influenced infant mortality, among children born in the five years preceding the survey, Ghana 2003, 2008, and 2014

| Characteristics of the child    | 2003 GDHS | 2008 GDHS | 2014 GDHS | Overall   |
|---------------------------------|-----------|-----------|-----------|-----------|
|                                 | %         | %         | %         | %         |
| <b>Age in years [Mean ± SD]</b> | 2.2 ± 1.5 | 2.3 ± 1.5 | 2.3 ± 1.5 | 2.3 ± 2.3 |
| <b>Sex of child</b>             |           |           |           |           |
| Male                            | 50.6      | 51.9      | 52.2      | 51.6      |
| Female                          | 49.4      | 48.1      | 47.8      | 48.4      |
| <b>Birth type</b>               |           |           |           |           |
| Single birth                    | 96.0      | 95.7      | 94.9      | 95.5      |
| Multiple births                 | 4.0       | 4.3       | 5.1       | 4.5       |
| <b>Birth order</b>              |           |           |           |           |
| First                           | 22.5      | 23.7      | 24.0      | 23.5      |
| Second                          | 19.4      | 21.1      | 21.0      | 20.5      |
| Third                           | 15.5      | 17.0      | 17.3      | 16.7      |
| Fourth or higher                | 42.6      | 38.3      | 37.7      | 39.3      |
| <b>Preceding birth interval</b> |           |           |           |           |
| < 2 years                       | 10.5      | 10.7      | 9.9       | 10.3      |
| 2 years                         | 23.5      | 20.9      | 22.9      | 22.4      |
| 3+ years                        | 43.1      | 44.7      | 42.9      | 43.5      |
| Missing                         | 22.9      | 23.8      | 24.4      | 23.7      |

% represents column percentages, SD: Standard deviation

Table S5: The trend in coverage of recommended maternal and delivery care, and other interventions that could have influenced Infant mortality, among children born in the five years preceding the survey, Ghana 2003, 2008, and 2014

|                                                                 | 2003 GDHS | 2008 GDHS | 2014 GDHS | Overall |
|-----------------------------------------------------------------|-----------|-----------|-----------|---------|
|                                                                 | %         | %         | %         | %       |
| <b>RECOMMENDED MATERNAL AND DELIVERY CARE</b>                   |           |           |           |         |
| <b>Number of ANC visits attended<sup>1</sup></b>                |           |           |           |         |
| None                                                            | 4.6       | 2.5       | 1.9       | 2.9     |
| 1 – 3 times                                                     | 15.0      | 11.6      | 7.0       | 10.9    |
| 4 + times                                                       | 50.4      | 56.4      | 63.5      | 57.3    |
| Missing                                                         | 30.0      | 29.5      | 27.7      | 28.9    |
| <b>Mother received tetanus injections</b>                       |           |           |           |         |
| None                                                            | 10.4      | 8.0       | 7.8       | 8.7     |
| One                                                             | 24.0      | 22.7      | 22.9      | 23.2    |
| Two or more                                                     | 36.6      | 40.5      | 41.5      | 39.7    |
| Missing                                                         | 29.0      | 28.7      | 27.8      | 28.4    |
| <b>Delivered in health facility<sup>2</sup></b>                 |           |           |           |         |
| No                                                              | 53.4      | 42.0      | 26.6      | 39.5    |
| Yes                                                             | 45.6      | 57.1      | 73.0      | 59.8    |
| Missing                                                         | 1.0       | 0.9       | 0.4       | 0.7     |
| <b>OTHER INTERVENTIONS RELEVANT TO UNDER-FIVE SURVIVAL</b>      |           |           |           |         |
| <b>Mother has health insurance<sup>3</sup></b>                  |           |           |           |         |
| No                                                              | n/a       | 3.3       | 8.5       | 4.3     |
| Yes, card seen                                                  | n/a       | 24.4      | 38.9      | 22.7    |
| Yes, card not seen                                              | n/a       | 10.0      | 20.0      | 10.9    |
| Missing                                                         | n/a       | 62.3      | 32.6      | 62.2    |
| <b>Household owns a mosquito net<sup>3</sup></b>                |           |           |           |         |
| No                                                              | 75.5      | 28.5      | 19.1      | 38.9    |
| Yes                                                             | 24.5      | 71.5      | 80.9      | 61.1    |
| <b>Mother slept under a net previous night<sup>3</sup></b>      |           |           |           |         |
| No                                                              | 84.8      | 56.0      | 49.4      | 62.0    |
| Yes                                                             | 15.2      | 44.0      | 50.6      | 38.0    |
| <b>Number of children slept under mosquito net previous net</b> |           |           |           |         |
| None                                                            | 83.8      | 53.8      | 49.3      | 61.0    |
| One or more                                                     | 16.2      | 46.2      | 50.7      | 39.0    |

% represents column percentages, SD: Standard deviation, n/a: not applicable

Table S6\_1: Infant mortality rate [IMR] in the five years preceding the survey and the difference in IMR between surveys, by selected characteristics of the household, Ghana 2003, 2008, and 2014

| Characteristics of the households                | 2003 GDHS<br>Ref. period: |         | 2008 GDHS<br>Ref. period: |           | 2014 GDHS<br>Ref. period: |           | The difference in IMR between surveys |             |             |
|--------------------------------------------------|---------------------------|---------|---------------------------|-----------|---------------------------|-----------|---------------------------------------|-------------|-------------|
|                                                  | IMR [95% CI]              | P-value | IMR [95% CI]              | P-value   | IMR [95% CI]              | P-value   | 2003 - 2008                           | 2003 - 2014 | 2008 - 2014 |
| <b>Sex of household head</b>                     |                           | 0.069   |                           | 0.995     |                           | 0.143     |                                       |             |             |
| Male                                             | 61.5[53.2-71.1]           |         | 55.9[46.7-66.7]           |           | 41.9[36.3-48.4]           |           | -5.6                                  | -19.6***    | -14.0*      |
| Female                                           | 76.4[60.3-96.5]           |         | 59.0[43.9-79.0]           |           | 52.4[41.6-66.1]           |           | -17.4**                               | -24.0**     | -6.6        |
| <b>Place</b>                                     |                           | 0.124   |                           | 0.840     |                           | 0.906     |                                       |             |             |
| Urban                                            | 54.6[42.1-70.7]           |         | 60.1[46.5-77.6]           |           | 45.3[37.4-54.9]           |           | 5.5                                   | -9.3**      | -14.8       |
| Rural                                            | 68.9[59.8-79.2]           |         | 55.0[45.5-66.4]           |           | 43.8[37.4-51.4]           |           | -13.9**                               | -25.1***    | -11.2       |
| <b>Region</b>                                    |                           | 0.109   |                           | <0.001*** |                           | 0.001**   |                                       |             |             |
| Western                                          | 73.4[49.8-107.6]          |         | 36.2[19.0-68.5]           |           | 31.0[19.4-49.4]           |           | -37.2*                                | -42.4**     | -5.2        |
| Central                                          | 78.4[50.1-121.7]          |         | 63.8[37.5-107.4]          |           | 44.0[29.9-64.5]           |           | -14.6                                 | -34.4       | -19.8       |
| Greater Accra                                    | 43.3[25.9-72.0]           |         | 54.6[32.7-90.5]           |           | 23.2[12.6-42.7]           |           | 11.3                                  | -20.1       | -31.4       |
| Volta                                            | 76.8[50.2-116.6]          |         | 26.2[11.9-57.4]           |           | 41.7[26.8-64.5]           |           | -50.6***                              | -35.1**     | 15.5        |
| Eastern                                          | 63.5[40.9-97.8]           |         | 53.9[31.6-91.1]           |           | 57.1[40.0-81.1]           |           | -9.6                                  | -6.4        | 3.2         |
| Ashanti                                          | 76.6[57.2-102.3]          |         | 55.9[37.5-83.0]           |           | 61.5[44.6-84.7]           |           | -20.7                                 | -15.1       | 5.6         |
| Brong Ahafo                                      | 62.4[43.2-89.7]           |         | 31.8[16.0-62.7]           |           | 33.6[22.0-51.1]           |           | -30.6                                 | -28.8*      | 1.8         |
| Northern                                         | 63.5[46.4-86.6]           |         | 79.3[57.5-108.7]          |           | 53.9[40.4-71.9]           |           | 15.8                                  | -9.6        | -25.4       |
| Upper East                                       | 36.6[19.8-66.9]           |         | 33.2[1.06-68.6]           |           | 29.8[18.0-49.0]           |           | -3.4                                  | -6.8        | -3.4        |
| Upper West                                       | 70.1[47.5-102.8]          |         | 103.6[73.1-145.7]         |           | 61.7[43.3-87.6]           |           | 33.5                                  | -8.4**      | -41.9*      |
| <b>Wealth</b>                                    |                           | 0.672   |                           | 0.457     |                           | 0.853     |                                       |             |             |
| Poorest                                          | 60.3[48.2-75.3]           |         | 59.1[45.6-76.5]           |           | 45.6[36.8-56.5]           |           | -1.2                                  | -14.7*      | -13.5       |
| Poorer                                           | 62.4[47.7-81.6]           |         | 43.2[29.6-62.8]           |           | 44.9[34.6-58.1]           |           | -19.2**                               | -17.5**     | 1.7         |
| Middle                                           | 83.9[64.7-108.4]          |         | 69.1[49.4-96.4]           |           | 40.8[30.2-55.1]           |           | -14.8                                 | -43.1**     | -28.3*      |
| Richer                                           | 58.5[41.2-82.6]           |         | 61.2[42.6-87.5]           |           | 45.0[32.8-61.6]           |           | 2.7                                   | -13.5       | -16.2       |
| Richest                                          | 62.9[44.1-89.3]           |         | 50.9[31.9-80.6]           |           | 45.2[32.0-63.6]           |           | -12                                   | -17.7*      | -5.7        |
| <b>Household</b>                                 |                           | 0.108   |                           | 0.097     |                           | <0.001*** |                                       |             |             |
| <5 residents                                     | 77.5[63.4-94.5]           |         | 62.9[49.2-80.3]           |           | 56.2[46.8-67.5]           |           | -14.6                                 | -21.3**     | -6.7        |
| 5-7 residents                                    | 62.4[51.5-75.5]           |         | 53.2[41.9-67.3]           |           | 32.5[26.2-40.1]           |           | -9.2**                                | -29.9***    | -20.7*      |
| 8+ residents                                     | 53.6[40.6-70.5]           |         | 53.9[38.4-75.4]           |           | 51.8[39.9-67.1]           |           | 0.3                                   | -1.8        | -2.1        |
| <b>Household access to improved water source</b> |                           | 0.609   |                           | 0.770     |                           | 0.929     |                                       |             |             |
| Improved                                         | 62.6[54.1-72.4]           |         | 58.2[49.4-68.4]           |           | 44.5[39.1-50.7]           |           | -4.4*                                 | -18.1***    | -13.7*      |
| Not improved                                     | 72.2[56.9-91.3]           |         | 48.2[31.4-73.8]           |           | 43.7[30.6-62.3]           |           | -24.0                                 | -28.5**     | -4.5        |
| <b>Household access to improved toilet</b>       |                           | 0.020*  |                           | 0.866     |                           | 0.579     |                                       |             |             |
| Improved not shared                              | 85.0[58.6-122.4]          |         | 68.3[41.0-112.6]          |           | 43.0[29.0-63.5]           |           | -16.7                                 | -42.0**     | -25.3       |
| Improved shared                                  | 59.3[49.5-71.1]           |         | 58.9[47.3-73.2]           |           | 46.2[38.9-54.9]           |           | -0.4                                  | -13.1**     | -12.7*      |
| Not improved                                     | 64.1[52.5-78.3]           |         | 53.1[41.9-67.1]           |           | 42.3[34.7-51.6]           |           | -11.0*                                | -21.8***    | -10.8       |
| <b>Overall</b>                                   | 65.0[57.4-73.5]           |         | 56.7[48.7-66.0]           |           | 44.4[39.3-50.2]           |           | -8.3 *                                | -20.6***    | -12.3***    |

p-value notation: \*\*\*p<0.001, \*\*p<0.01, \*p<0.05. CI: Confidence interval

Table S6\_2: Infant mortality rate [IMR] in the five years preceding the survey and the difference in IMR between surveys, by selected characteristics of the mother, Ghana 2003, 2008, and 2014

| Characteristics of mother            | 2003 GDHS           |         | 2008 GDHS           |         | 2014 GDHS          |         | The difference in IMR between surveys |             |             |
|--------------------------------------|---------------------|---------|---------------------|---------|--------------------|---------|---------------------------------------|-------------|-------------|
|                                      | IMR [95% CI]        | P-value | IMR [95% CI]        | P-value | IMR [95% CI]       | P-value | 2003 - 2008                           | 2003 - 2014 | 2008 - 2014 |
| <b>Mother's age at child's birth</b> |                     | 0.014*  |                     | 0.867   |                    | 0.748   |                                       |             |             |
| < 18                                 | 78.4[63.2 - 97.1]   |         | 51.3[37.6 - 69.9]   |         | 42.4[32.9 - 54.5]  |         | -27.1**                               | -36***      | -8.9        |
| 18 - 34                              | 59.8[51.3 - 69.5]   |         | 58.4[49.0 - 69.6]   |         | 44.9[38.9 - 51.7]  |         | -1.4                                  | -14.9***    | -13.5       |
| 35+                                  | 105.3[15.5 - 546.3] |         | 111.1[16.4 - 567.0] |         | 90.8[23.3 - 318.7] |         | 5.8                                   | -14.5       | -20.3       |
| <b>Marital status</b>                |                     | 0.537   |                     | 0.148   |                    | 0.118   |                                       |             |             |
| Never married                        | 75.6[36.7 - 152.2]  |         | 24.9[8.1 - 75.2]    |         | 63.4[42.6 - 94.0]  |         | -50.7*                                | -12.2       | 38.5        |
| Currently married                    | 63.9[56.1 - 72.8]   |         | 57.5[49.0 - 67.4]   |         | 42.7[37.3 - 48.8]  |         | -6.4*                                 | -21.2***    | -14.8**     |
| Formerly married                     | 75.4[47.5 - 118.6]  |         | 69.0[37.7 - 124.4]  |         | 47.3[29.7 - 75.1]  |         | -6.4                                  | -28.1       | -21.7       |
| <b>Educational attainment</b>        |                     | 0.034*  |                     | 0.071   |                    | 0.123   |                                       |             |             |
| None                                 | 62.8[52.3 - 75.5]   |         | 60.4[47.6 - 76.5]   |         | 48.2[39.4 - 58.8]  |         | -2.4                                  | -14.6**     | -12.2       |
| Primary                              | 83.3[65.9 - 105.0]  |         | 57.0[41.7 - 77.5]   |         | 38.1[28.4 - 51.1]  |         | -26.3                                 | -45.2**     | -18.9       |
| Secondary                            | 55.7[43.6 - 71.1]   |         | 55.0[42.4 - 71.3]   |         | 43.0[35.4 - 52.3]  |         | -0.7                                  | -12.7**     | -12.0       |
| Tertiary                             | 51.3[13.1 - 189.8]  |         | 16.0[2.3 - 108.2]   |         | 59.6[34.2 - 102.7] |         |                                       |             |             |
| <b>Body mass index</b>               |                     | 0.857   |                     | 0.326   |                    | 0.135   |                                       |             |             |
| Underweight                          | 68.7[45.4 - 103.5]  |         | 67.6[40.6 - 111.6]  |         | 55.0[27.8 - 107.0] |         | -1.1                                  | -13.7       | -12.6       |
| Normal                               | 65.0[55.9 - 75.6]   |         | 56.0[46.3 - 67.6]   |         | 35.0[27.1 - 45.0]  |         | -9.0**                                | -30.0***    | -21.0*      |
| Overweight                           | 61.9[44.1 - 86.4]   |         | 47.3[32.2 - 69.3]   |         | 60.8[45.0 - 82.0]  |         | -14.6                                 | -1.1        | 13.5        |
| Obese                                | 63.6[37.4 - 107.0]  |         | 74.0[44.4 - 121.9]  |         | 45.7[28.3 - 73.5]  |         | 10.4                                  | -17.9       | -28.3       |
| <b>Overall</b>                       | 65.0[57.4-73.5]     |         | 56.7[48.7-66.0]     |         | 44.4[39.3-50.2]    |         | -8.3 *                                | -20.6***    | -12.3***    |

p-value notation: \*\*\*p<0.001, \*\*p<0.01, \*p<0.05. CI: Confidence interval

Table S6\_3: Infant mortality rate [IMR] in the five years preceding the survey and the difference in IMR between surveys, by selected characteristics of the child, Ghana DHS 2003, 2008, and 2014

| Characteristics of the child | 2003 GDHS            |           | 2008 GDHS          |           | 2014 GDHS            |           | The difference in IMR between surveys |             |             |
|------------------------------|----------------------|-----------|--------------------|-----------|----------------------|-----------|---------------------------------------|-------------|-------------|
|                              | IMR [95% CI]         | P-value   | IMR [95% CI]       | P-value   | IMR [95% CI]         | P-value   | 2003 - 2008                           | 2003 - 2014 | 2008 - 2014 |
| <b>Sex of Child</b>          |                      | 0.630     |                    | 0.458     |                      | 0.204     |                                       |             |             |
| Male                         | 72.2[61.2 - 85.1]    |           | 60.4[49.1 - 74.2]  |           | 47.0[39.8 - 55.4]    |           | -11.8                                 | -25.2***    | -13.4       |
| Female                       | 57.5[47.6 - 69.3]    |           | 52.8[42.1 - 66.1]  |           | 41.6[34.6 - 50.0]    |           | -4.7*                                 | -15.9***    | -11.2       |
| <b>Birth type</b>            |                      | <0.001*** |                    | <0.001*** |                      | <0.001*** |                                       |             |             |
| Single birth                 | 58.5[51.2 - 66.8]    |           | 52.2[44.3 - 61.4]  |           | 37.8[33.0 - 43.4]    |           | -6.3**                                | -20.7***    | -14.4**     |
| Multiple Births              | 222.5[162.8 - 299.9] |           | 153.8[101 - 230.6] |           | 169.3[130.0 - 218.9] |           | -68.7                                 | -53.2*      | 15.5        |
| <b>Birth order</b>           |                      | 0.410     |                    | 0.062     |                      | 0.132     |                                       |             |             |
| First                        | 69.2[53.6 - 89.2]    |           | 58.1[42.4 - 79.3]  |           | 45.2[35.0 - 58.2]    |           | -11.1                                 | -24.0**     | -12.9       |
| Second                       | 49.0[35.1 - 68.3]    |           | 35.3[22.9 - 54.2]  |           | 37.4[27.6 - 50.4]    |           | -13.7                                 | -11.6       | 2.1         |
| Third                        | 67.4[49.3 - 91.9]    |           | 54.0[36.8 - 78.9]  |           | 37.5[27.1 - 51.9]    |           | -13.4                                 | -29.9*      | -16.5       |
| Fourth or higher             | 68.7[57.3 - 82.3]    |           | 68.2[54.8 - 84.8]  |           | 50.4[42.1 - 60.5]    |           | -0.5                                  | -18.3***    | -17.8       |
| <b>Birth interval</b>        |                      | <0.001*** |                    | 0.041*    |                      | 0.047*    |                                       |             |             |
| < 2 years                    | 132.4[102.2 - 170.5] |           | 87.0[60.1 - 125.3] |           | 62.1[44.3 - 86.7]    |           | -45.4                                 | -70.3**     | -24.9       |
| 2 years                      | 54.7[41.4 - 72.2]    |           | 53.5[38.1 - 74.9]  |           | 44.1[34.0 - 57.1]    |           | -1.2                                  | -10.6       | -9.4        |
| 3+ years                     | 52.3[42.3 - 64.5]    |           | 50.5[39.5 - 64.3]  |           | 39.7[32.6 - 48.2]    |           | -1.8                                  | -12.6***    | -10.8*      |
| <b>Overall</b>               | 65.0[57.4 - 73.5]    |           | 56.7[48.7 - 66.0]  |           | 44.4[39.3 - 50.2]    |           | -8.3 *                                | -20.6***    | -12.3***    |

p-value notation: \*\*\*p<0.001, \*\*p<0.01, \*p<0.05. CI: Confidence interval

Table S6\_4: Infant mortality rate [IMR] in the five years preceding the survey and the difference in IMR between surveys, by use of selected recommended mother's and delivery care services and other relevant interventions, Ghana 2003, 2008, and 2014.

| RECOMMENDED MATERNAL AND DELIVERY CARE                          | 2003 GDHS         |         | 2008 GDHS          |           | 2014 GDHS          |           | The difference in IMR between surveys |             |             |
|-----------------------------------------------------------------|-------------------|---------|--------------------|-----------|--------------------|-----------|---------------------------------------|-------------|-------------|
|                                                                 | IMR [95% CI]      | P-value | IMR [95% CI]       | P-value   | IMR [95% CI]       | P-value   | 2003 - 2008                           | 2003 - 2014 | 2008 - 2014 |
| <b>Number of ANC visits attended<sup>1</sup></b>                |                   | 0.623   |                    | 0.271     |                    | 0.049*    |                                       |             |             |
| None                                                            | 41.1[20.8 - 80.6] |         | 39.2[12.8 - 116.7] |           | 61.7[29.8 - 125.5] |           | -1.9                                  | 20.6        | 22.5        |
| 1 - 3 times                                                     | 34.4[21.5 - 54.8] |         | 45.4[27.0 - 75.7]  |           | 21.0[10.5 - 41.7]  |           | 11.0                                  | -13.4**     | -24.4*      |
| 4 + times                                                       | 45.7[36.9 - 56.6] |         | 32.7[24.7 - 43.1]  |           | 25.3[20.5 - 31.2]  |           | -13.0**                               | -20.4***    | -7.4        |
| <b>Mother received tetanus injections<sup>1</sup></b>           |                   | 0.921   |                    | 0.952     |                    | 0.310     |                                       |             |             |
| None                                                            | 42.6[26.7 - 67.8] |         | 25.3[11.5 - 55.5]  |           | 37.3[23.0 - 60.2]  |           | -17.3                                 | -5.3        | 12.0        |
| One                                                             | 46.4[34.0 - 63.3] |         | 33.5[21.7 - 51.6]  |           | 26.1[18.5 - 36.7]  |           | -12.9                                 | -20.3**     | -7.4        |
| Two or more                                                     | 41.6[31.9 - 54.1] |         | 39.6[29.4 - 53.3]  |           | 22.8[17.4 - 30.0]  |           | -2.0*                                 | -18.8***    | -16.8       |
| <b>Delivered in health facility<sup>2</sup></b>                 |                   | 0.791   |                    | 0.387     |                    | 0.165     |                                       |             |             |
| No                                                              | 61.7[52.1 - 73.0] |         | 56.1[44.7 - 70.3]  |           | 45.6[36.5 - 56.7]  |           | -5.6                                  | -16.1**     | -10.5       |
| Yes                                                             | 61.9[50.9 - 75.3] |         | 54.7[44.2 - 67.6]  |           | 43.1[37.1 - 50.1]  |           | -7.2*                                 | -18.8***    | -11.6       |
| <b>Household owns a mosquito net<sup>3</sup></b>                |                   | 0.302   |                    | 0.039*    |                    | 0.530     |                                       |             |             |
| No                                                              | 68.0[59.0 - 78.3] |         | 70.7[54.3 - 91.8]  |           | 41.2[30.5 - 55.6]  |           | 2.7                                   | -26.8***    | -29.5**     |
| Yes                                                             | 56.8[44.0 - 73.2] |         | 51.6[42.8 - 62.1]  |           | 45.1[39.4 - 51.6]  |           | -5.2                                  | -11.7**     | -6.5        |
| <b>Mother slept under a net previous night<sup>3</sup></b>      |                   | 0.188   |                    | 0.003**   |                    | 0.832     |                                       |             |             |
| No                                                              | 67.8[59.3 - 77.4] |         | 71.6[59.5 - 86.0]  |           | 42.1[35.0 - 50.6]  |           | 3.8                                   | -25.7***    | -29.5***    |
| Yes                                                             | 50.8[36.0 - 71.5] |         | 39.8[30.4 - 51.9]  |           | 46.5[39.4 - 54.8]  |           | -11.0*                                | -4.3        | 6.7         |
| <b>Number of children slept under mosquito net previous net</b> |                   | 0.002** |                    | <0.001*** |                    | <0.001*** |                                       |             |             |
| None                                                            | 69.9[61.3 - 79.7] |         | 78.5[65.7 - 93.7]  |           | 56.9[48.6 - 66.6]  |           | 8.6                                   | -13.0***    | -21.6**     |
| One or more                                                     | 41.7[28.8 - 60.2] |         | 32.9[24.6 - 44.0]  |           | 33.2[27.3 - 40.4]  |           | -8.8                                  | -8.5        | 0.3         |
| <b>Overall</b>                                                  | 65.0[57.4 - 73.5] |         | 56.7[48.7 - 66.0]  |           | 44.4[39.3 - 50.2]  |           | -8.3 *                                | -20.6***    | -12.3***    |

p-value notation: \*\*\*p<0.001, \*\*p<0.01, \*p<0.05. CI: Confidence interval



Table S7\_1: Under-five mortality rate [U5MR] in the five years preceding the survey and the difference in U5MR between surveys, by selected characteristics of the household, Ghana 2003, 2008, and 2014.

| Characteristics of the households                | 2003 GDHS<br>Ref. period: |         | 2008 GDHS<br>Ref. period: |           | 2014 GDHS<br>Ref. period: |           | The difference in U5MR between surveys |             |             |
|--------------------------------------------------|---------------------------|---------|---------------------------|-----------|---------------------------|-----------|----------------------------------------|-------------|-------------|
|                                                  | U5MR [95% CI]             | P-value | U5MR [95% CI]             | P-value   | U5MR [95% CI]             | P-value   | 2003 - 2008                            | 2003 - 2014 | 2008 - 2014 |
| <b>Sex of household head</b>                     |                           | 0.069   |                           | 0.995     |                           | 0.143     |                                        |             |             |
| Male                                             | 104.1[89.2-121.4]         |         | 83.9[70.1-100.3]          |           | 57.3[49.5-66.3]           |           | -20.2                                  | -46.8***    | -26.6*      |
| Female                                           | 121.7[98.4-150.1]         |         | 81.4[61.4-107.4]          |           | 74.7[57.2-97.2]           |           | -40.3**                                | -47.0**     | -6.7        |
| <b>Place</b>                                     |                           | 0.124   |                           | 0.840     |                           | 0.906     |                                        |             |             |
| Urban                                            | 100.5[76.2-132.0]         |         | 87.5[66.3-115.1]          |           | 60.5[49.1-74.4]           |           | -13.0                                  | -40.0**     | -27.0       |
| Rural                                            | 110.6[96.1-127.1]         |         | 81.3[67.8-97.4]           |           | 62.3[52.7-73.6]           |           | -29.3**                                | -48.3***    | -19.0       |
| <b>Region</b>                                    |                           | 0.109   |                           | <0.001*** |                           | 0.001**   |                                        |             |             |
| Western                                          | 133.5[89.1-197.5]         |         | 41.4[22.4-75.9]           |           | 36.1[22.2-58.5]           |           | -92.1*                                 | -97.4**     | -5.3        |
| Central                                          | 92.4[60.1-140.8]          |         | 138.6[78-239.6]           |           | 66.3[45.5-96.3]           |           | 46.2                                   | -26.1       | -72.3       |
| Greater Accra Central                            | 96.8[62.2-149.0]          |         | 59.5[36.2-97.0]           |           | 32.4[18.9-55.5]           |           | -37.3                                  | -64.4       | -27.1       |
| Volta                                            | 129.2[84.4-195.3]         |         | 34.5[16.1-73.0]           |           | 52.2[34.3-79.0]           |           | -94.7***                               | -77.0**     | 17.7        |
| Eastern                                          | 80.4[53.1-121.0]          |         | 69.8[43.2-111.9]          |           | 73.4[46.8-114.2]          |           | -10.6                                  | -7.0        | 3.6         |
| Ashanti                                          | 103.5[74.0-143.7]         |         | 71.5[48.7-104.4]          |           | 83.1[56.2-122.1]          |           | -32.0                                  | -20.4       | 11.6        |
| Brong Ahafo                                      | 101.6[66.2-154.3]         |         | 57.5[32.4-101.0]          |           | 47.1[30.9-71.6]           |           | -44.1                                  | -54.5*      | -10.4       |
| Northern                                         | 111.2[84.8-145.1]         |         | 119.7[90.3-157.8]         |           | 91.9[68.6-122.6]          |           | 8.5                                    | -19.3       | -27.8       |
| Upper East                                       | 68.6[29.2-156.5]          |         | 69.3[31.4-149.4]          |           | 36.7[22.7-59.2]           |           | 0.7                                    | -31.9       | -32.6       |
| Upper West                                       | 150.9[111.2-203.0]        |         | 144.3[103.3-199.6]        |           | 74.7[53.3-104.1]          |           | -6.6                                   | -76.2**     | -69.6*      |
| <b>Wealth</b>                                    |                           | 0.672   |                           | 0.457     |                           | 0.853     |                                        |             |             |
| Poorest                                          | 115.7[93.7-142.5]         |         | 92.5[71.9-118.7]          |           | 61.7[50.5-75.3]           |           | -23.2                                  | -54.0*      | -30.8       |
| Poorer                                           | 109.6[84.4-141.8]         |         | 67.7[48.3-94.7]           |           | 73.1[54.6-97.4]           |           | -41.9**                                | -36.5**     | 5.4         |
| Middle                                           | 110.6[84.8-143.7]         |         | 92.3[66.9-126.7]          |           | 63.4[45.5-88.1]           |           | -18.3                                  | -47.2**     | -28.9*      |
| Richer                                           | 86.5[63.1-118.1]          |         | 88.1[56.6-135.7]          |           | 52.7[38.8-71.2]           |           | 1.6                                    | -33.8       | -35.4       |
| Richest                                          | 108.5[67.4-172.3]         |         | 66.5[43.7-100.6]          |           | 47.0[33.5-65.9]           |           | -42.0                                  | -61.5*      | -19.5       |
| <b>Household</b>                                 |                           | 0.108   |                           | 0.097     |                           | <0.001*** |                                        |             |             |
| <5 residents                                     | 116.7[97.1-140.0]         |         | 102.9[80.3-131.4]         |           | 87.9[70.5-109.2]          |           | -13.8                                  | -28.8**     | -15.0       |
| 5-7 residents                                    | 102.3[84.0-124.4]         |         | 71.6[56.0-91.4]           |           | 43.5[35.6-53.1]           |           | -30.7**                                | -58.8***    | -28.1*      |
| 8+ residents                                     | 106.8[79.4-142.9]         |         | 76.9[56.5-104.4]          |           | 60.9[47.3-78.3]           |           | -29.9                                  | -45.9       | -16.0       |
| <b>Household access to improved water source</b> |                           | 0.609   |                           | 0.770     |                           | 0.929     |                                        |             |             |
| Improved                                         | 107.0[92.3-123.9]         |         | 82.0[70.0-96.0]           |           | 60.8[53.0-69.7]           |           | -25.0*                                 | -46.2***    | -21.2*      |
| Not improved                                     | 111.3[87.0-142.0]         |         | 92.6[57.2-148.1]          |           | 66.9[44.6-99.7]           |           | -18.7                                  | -44.4**     | -25.7       |
| <b>Household access to improved sanitation</b>   |                           | 0.020*  |                           | 0.866     |                           | 0.579     |                                        |             |             |
| Improved not shared                              | 189.7[120.6-291.5]        |         | 81.2[50.4-129.5]          |           | 43.0[29.0-63.5]           |           | -108.5                                 | -146.7**    | -38.2       |
| Improved shared                                  | 85.0[70.7-102.0]          |         | 86.5[69.0-108.3]          |           | 58.8[48.9-70.6]           |           | 1.5                                    | -26.2**     | -27.7*      |
| Not improved                                     | 118.9[98.7-143.0]         |         | 81.5[64.9-102.1]          |           | 68.2[55.6-83.5]           |           | -37.4*                                 | -50.7***    | -13.3       |
| <b>Overall</b>                                   | 108.1[95.2-122.6]         |         | 83.3[71.5-96.8]           |           | 61.6[54.1-70.1]           |           | -24.8 *                                | -46.5***    | -21.7***    |

p-value notation: \*\*\*p<0.001, \*\*p<0.01, \*p<0.05.

Table S7\_2: Under-five mortality rate [U5MR] in the five years preceding the survey and the difference in U5MR between surveys, by selected characteristics of the mother, Ghana 2003, 2008, and 2014.

| Characteristics of mother            | 2003 GDHS            |         | 2008 GDHS           |         | 2014 GDHS           |         | Difference in U5MR between surveys |             |             |
|--------------------------------------|----------------------|---------|---------------------|---------|---------------------|---------|------------------------------------|-------------|-------------|
|                                      | U5MR [95% CI]        | P-value | U5MR [95% CI]       | P-value | U5MR [95% CI]       | P-value | 2003 - 2008                        | 2003 - 2013 | 2008 - 2013 |
| <b>Mother's age at child's birth</b> |                      | 0.014*  |                     | 0.867   |                     | 0.748   |                                    |             |             |
| < 18                                 | 152.8[119.9 - 193.8] |         | 83.1[63.3 - 108.7]  |         | 60.0[45.8 - 78.5]   |         | -69.7**                            | -92.8***    | -23.1       |
| 18 - 34                              | 91.3[79.5 - 104.8]   |         | 83.0[69.1 - 99.5]   |         | 62.0[53.4 - 71.9]   |         | -8.3                               | -29.3***    | -21.0       |
| 35+                                  | 105.3[15.5 - 546.3]  |         | 111.1[16.4 - 567.0] |         | 90.8[23.3 - 318.7]  |         | 5.8                                | -14.5       | -20.3       |
| <b>Marital status</b>                |                      | 0.537   |                     | 0.148   |                     | 0.118   |                                    |             |             |
| Never married                        | 175.0[83.1 - 347.3]  |         | 24.9[8.1 - 75.2]    |         | 106.6[57.6 - 192.9] |         | -150.1*                            | -68.4       | 81.7        |
| Currently married                    | 104.0[91.1 - 118.5]  |         | 85.1[72.7 - 99.6]   |         | 57.4[49.9 - 66.0]   |         | -18.9*                             | -46.6***    | -27.7**     |
| Formerly married                     | 139.1[85.3 - 222.6]  |         | 93.1[52.3 - 163.2]  |         | 77.9[51.8 - 116.4]  |         | -46.0                              | -61.2       | -15.2       |
| <b>Educational attainment</b>        |                      | 0.034*  |                     | 0.071   |                     | 0.123   |                                    |             |             |
| None                                 | 121.7[101.1 - 146.1] |         | 94.8[75.6 - 118.6]  |         | 74.1[61.0 - 89.9]   |         | -26.9                              | -47.6**     | -20.7       |
| Primary                              | 119.2[96.0 - 147.4]  |         | 102.9[75.3 - 140]   |         | 59.8[43.4 - 82.3]   |         | -16.3                              | -59.4**     | -43.1       |
| Secondary                            | 80.1[61.1 - 104.7]   |         | 60.9[47.3 - 78.2]   |         | 51.5[41.4 - 64.1]   |         | -19.2                              | -28.6**     | -9.4        |
| Tertiary                             | 51.3[13.1 - 189.8]   |         | 16.0[2.3 - 108.2]   |         | 59.6[34.2 - 102.7]  |         |                                    |             |             |
| <b>Body mass index</b>               |                      | 0.857   |                     | 0.326   |                     | 0.135   |                                    |             |             |
| Underweight                          | 125.1[72.3 - 211.7]  |         | 108[58.2 - 195.7]   |         | 55.0[27.8 - 107.0]  |         | -17.1                              | -70.1       | -53.0       |
| Normal                               | 111.6[95.5 - 130.2]  |         | 79.5[66.7 - 94.7]   |         | 59.3[45.0 - 77.8]   |         | -32.1**                            | -52.3***    | -20.2       |
| Overweight                           | 88.7[65.2 - 120.2]   |         | 66.4[47.1 - 93.2]   |         | 71.9[53.3 - 96.6]   |         | -22.3                              | -16.8       | 5.5         |
| Obese                                | 107.2[64.6 - 175.0]  |         | 141.3[78.7 - 246.7] |         | 49.1[30.8 - 77.9]   |         | 34.1                               | -58.1       | -92.2       |
| <b>Overall</b>                       | 108.1[95.2-122.6]    |         | 83.3[71.5-96.8]     |         | 61.6[54.1-70.1]     |         | -24.8 *                            | -46.5***    | -21.7***    |

p-value notation: \*\*\*p<0.001, \*\*p<0.01, \*p<0.05.

Table S7\_3: Under-five mortality rate [U5MR] in the five years preceding the survey and the difference in U5MR between surveys, by selected characteristics of the child, Ghana 2003, 2008, and 2014

| Characteristics of the child | 2003 GDHS<br>Ref. period: |           | 2008 GDHS<br>Ref. period: |           | 2014 GDHS<br>Ref. period: |           | Difference in U5MR between surveys |                 |                 |
|------------------------------|---------------------------|-----------|---------------------------|-----------|---------------------------|-----------|------------------------------------|-----------------|-----------------|
|                              | U5MR [95% CI]             | P-value   | U5MR [95% CI]             | P-value   | U5MR [95% CI]             | P-value   | 2003 - 2008                        | 2003 - 2014     | 2008 - 2014     |
| <b>Sex of Child</b>          |                           | 0.630     |                           | 0.458     |                           | 0.204     |                                    |                 |                 |
| Male                         | 104.2[87.4 - 124.0]       |           | 86.8[70.5 - 106.5]        |           | 67.0[56.1 - 80.0]         |           | -17.4                              | -37.2***        | -19.8           |
| Female                       | 112.0[93.4 - 134.2]       |           | 79.6[63.6 - 99.5]         |           | 55.7[46.0 - 67.3]         |           | -32.4*                             | -56.3***        | -23.9           |
| <b>Birth type</b>            |                           | <0.001*** |                           | <0.001*** |                           | <0.001*** |                                    |                 |                 |
| Single birth                 | 100.5[87.7 - 115.0]       |           | 77.9[66.2 - 91.7]         |           | 55.3[47.8 - 63.9]         |           | -22.6**                            | -45.2***        | -22.6**         |
| Multiple birth               | 296.7[215.1 - 400.4]      |           | 198.4[135.6 - 285.3]      |           | 181.1[139.6 - 233.1]      |           | -98.3                              | -115.6*         | -17.3           |
| <b>Birth order</b>           |                           | 0.410     |                           | 0.062     |                           | 0.132     |                                    |                 |                 |
| First                        | 102.3[80.3 - 130.1]       |           | 72.9[54.6 - 97.0]         |           | 64.7[49.2 - 84.9]         |           | -29.4                              | -37.6**         | -8.2            |
| Second                       | 98.7[69.9 - 138.6]        |           | 64.4[44.2 - 93.2]         |           | 53.6[37.4 - 76.4]         |           | -34.3                              | -45.1           | -10.8           |
| Third                        | 102.7[71.8 - 145.8]       |           | 66.4[46.4 - 94.8]         |           | 48.2[35.3 - 65.8]         |           | -36.3                              | -54.5*          | -18.2           |
| Fourth or higher             | 116.3[97.1 - 138.9]       |           | 105.7[83.9 - 132.8]       |           | 69.7[57.7 - 84.0]         |           | -10.6                              | -46.6***        | -36.0           |
| <b>Birth Interval</b>        |                           | <0.001*** |                           | 0.041*    |                           | 0.047*    |                                    |                 |                 |
| < 2 years                    | 168.5[131.4 - 214.7]      |           | 119.2[84.4 - 166.8]       |           | 95.0[61.7 - 144.9]        |           | -49.3                              | -73.5**         | -24.2           |
| 2 years                      | 112.2[84.4 - 148.4]       |           | 84.0[58.5 - 119.8]        |           | 63.9[50.5 - 80.6]         |           | -28.2                              | -48.3           | -20.1           |
| 3+ years                     | 93.9[75.1 - 117.0]        |           | 80.2[62.6 - 102.5]        |           | 50.7[41.8 - 61.4]         |           | -13.7                              | -43.2***        | -29.5*          |
| <b>Overall</b>               | 108.1[95.2-122.6]         |           | 83.3[71.5-96.8]           |           | 61.6[54.1-70.1]           |           | <b>-24.8 *</b>                     | <b>-46.5***</b> | <b>-21.7***</b> |

p-value notation: \*\*\*p<0.001, \*\*p<0.01, \*p<0.05.

Table S7\_4: Under-five mortality rate [U5MR] in the five years preceding the survey and the difference in U5MR between surveys, by selected characteristics of the recommended maternal and delivery care, Ghana 2003, 2008, and 2014.

| RECOMMENDED MATERNAL AND DELIVERY CARE                          | 2003 GDHS<br>Ref. period: |         | 2008 GDHS<br>Ref. period: |           | 2014 GDHS<br>Ref. period: |           | Difference in U5MR between surveys |                 |                 |
|-----------------------------------------------------------------|---------------------------|---------|---------------------------|-----------|---------------------------|-----------|------------------------------------|-----------------|-----------------|
|                                                                 | U5MR [95% CI]             | P-value | U5MR [95% CI]             | P-value   | U5MR [95% CI]             | P-value   | 2003 - 2008                        | 2003 - 2014     | 2008 - 2014     |
| <b>Number of ANC visits attended<sup>1</sup></b>                |                           | 0.623   |                           | 0.271     |                           | 0.049*    |                                    |                 |                 |
| None                                                            | 81.6[44.8 - 146.0]        |         | 76.2[25.4 - 216.7]        |           | 75.0[37.8 - 146.2]        |           | -5.4                               | -6.6            | -1.2            |
| 1 - 3 times                                                     | 95.6[43.1 - 204.9]        |         | 69.6[42.9 - 112.0]        |           | 35.3[18.9 - 65.6]         |           | -26.0                              | -60.3**         | -34.3*          |
| 4 + times                                                       | 82.0[63.0 - 106.4]        |         | 50.1[34.6 - 72.2]         |           | 44.8[33.6 - 59.6]         |           | -31.9**                            | -37.2***        | -5.3            |
| <b>Mother received tetanus injections<sup>1</sup></b>           |                           | 0.921   |                           | 0.952     |                           | 0.310     |                                    |                 |                 |
| None                                                            | 62.8[40.0 - 97.8]         |         | 90.6[31.3 - 247]          |           | 47.8[29.2 - 77.9]         |           | 27.8                               | -15.0           | -42.8           |
| One                                                             | 96.7[58.2 - 158.5]        |         | 51.0[34.3 - 75.5]         |           | 51.2[29.9 - 86.7]         |           | -45.7                              | -45.5**         | 0.2             |
| Two or more                                                     | 82.5[63.1 - 107.5]        |         | 48.9[36.5 - 65.5]         |           | 40.6[28.7 - 57.2]         |           | -33.6*                             | -41.9***        | -8.3            |
| <b>Delivered in health facility<sup>2</sup></b>                 |                           | 0.791   |                           | 0.387     |                           | 0.165     |                                    |                 |                 |
| No                                                              | 105.3[88.8 - 124.6]       |         | 86.3[69.5 - 107.1]        |           | 72.8[58.3 - 90.8]         |           | -19.0                              | -32.5**         | -13.5           |
| Yes                                                             | 101.2[82.2 - 124.3]       |         | 75.9[60.7 - 94.7]         |           | 55.1[47.0 - 64.5]         |           | -25.3*                             | -46.1***        | -20.8           |
| <b>Household owns a mosquito net<sup>3</sup></b>                |                           | 0.302   |                           | 0.039*    |                           | 0.530     |                                    |                 |                 |
| No                                                              | 109.5[94.8 - 126.4]       |         | 109.2[82.3 - 144]         |           | 75.3[55.4 - 101.9]        |           | -0.3                               | -34.2***        | -33.9**         |
| Yes                                                             | 104.0[80.0 - 134.7]       |         | 73.2[61.6 - 87.0]         |           | 58.5[50.7 - 67.4]         |           | -30.8                              | -45.5**         | -14.7           |
| <b>Mother slept under a net previous night<sup>3</sup></b>      |                           | 0.188   |                           | 0.003**   |                           | 0.832     |                                    |                 |                 |
| No                                                              | 111.5[97.1 - 127.8]       |         | 98.0[80.7 - 118.6]        |           | 63.8[52.6 - 77.4]         |           | -13.5                              | -47.7***        | -34.2***        |
| Yes                                                             | 90.9[66.7 - 123.4]        |         | 66.5[52.3 - 84.4]         |           | 59.2[49.8 - 70.3]         |           | -24.4*                             | -31.7           | -7.3            |
| <b>Number of children slept under mosquito net previous net</b> |                           | 0.002** |                           | <0.001*** |                           | <0.001*** |                                    |                 |                 |
| None                                                            | 116.9[102.1 - 133.6]      |         | 112.0[93.7 - 133.6]       |           | 80.7[68.5 - 94.9]         |           | -4.9                               | -36.2***        | -31.3**         |
| One or more                                                     | 65.3[4.06 - 92.3]         |         | 50.9[38.7 - 66.9]         |           | 43.9[35.6 - 54.1]         |           | -14.4                              | -21.4           | -7.0            |
| <b>Overall</b>                                                  | 108.1[95.2-122.6]         |         | 83.3[71.5-96.8]           |           | 61.6[54.1-70.1]           |           | <b>-24.8 *</b>                     | <b>-46.5***</b> | <b>-21.7***</b> |

p-value notation: \*\*\*p<0.001, \*\*p<0.01, \*p<0.05.

Table S8: Country-level indicators used in the penalized regress

| INDICATOR                                                                                 | DESCRIPTION OF INDICATOR                                                                                                                                                                                                                                                                                                                                                                                                                                                                                                                                          | SOURCE          |
|-------------------------------------------------------------------------------------------|-------------------------------------------------------------------------------------------------------------------------------------------------------------------------------------------------------------------------------------------------------------------------------------------------------------------------------------------------------------------------------------------------------------------------------------------------------------------------------------------------------------------------------------------------------------------|-----------------|
| Birth rate                                                                                | Crude birth rate indicates the number of live births occurring during the year, per 1,000 population estimated at midyear. Subtracting the crude death rate from the crude birth rate provides the rate of natural increase, which is equal to the rate of population change in the absence of migration.                                                                                                                                                                                                                                                         | Global economy  |
| Health spending per capita                                                                | Current expenditures on health per capita in current US dollars. Estimates of current health expenditures include healthcare goods and services consumed during each year.                                                                                                                                                                                                                                                                                                                                                                                        | Global economy  |
| Tuberculosis                                                                              | The incidence of tuberculosis is the estimated number of new and relapse tuberculosis cases arising in a given year, expressed as the rate per 100,000 population. All forms of TB are included, including cases in people living with HIV. Estimates for all years are recalculated as new information becomes available and techniques are refined, so they may differ from those published previously.                                                                                                                                                         | Global economy  |
| Access to electricity (% of the population)                                               | Access to electricity is the percentage of the population with access to electricity. Electrification data are collected from industry, national surveys, and international sources.                                                                                                                                                                                                                                                                                                                                                                              | World data bank |
| Access to drinking water, rural                                                           | The percentage of people using drinking water from an improved source that is accessible on premises, available when needed and free from fecal and priority chemical contamination. Improved water sources include piped water, boreholes or tube-wells, protected dug wells, protected springs, and packaged or delivered water.                                                                                                                                                                                                                                | Global economy  |
| Access to drinking water, urban                                                           | Access to an improved water source, urban, refers to the percentage of the urban population using an improved drinking water source. The improved drinking water source includes piped water on premises (piped household water connection located inside the user's dwelling, plot or yard), and other improved drinking water sources (public taps or standpipes, tube wells or boreholes, protected dug wells, protected springs, and rainwater collection).                                                                                                   | Global economy  |
| Voice and accountability                                                                  | The index for Voice and Accountability captures perceptions of the extent to which the citizens are able to participate in selecting their government, as well as freedom of expression, freedom of association, and a free media.                                                                                                                                                                                                                                                                                                                                | Global economy  |
| Rule of law                                                                               | The index for Rule of Law captures perceptions of the extent to which agents have confidence in and abide by the rules of society, and in particular the quality of contract enforcement, property rights, the police, and the courts, as well as the likelihood of crime and violence.                                                                                                                                                                                                                                                                           | Global economy  |
| Government effectiveness                                                                  | The index of Government Effectiveness captures perceptions of the quality of public services, the quality of the civil service and the degree of its independence from political pressures, the quality of policy formulation and implementation, and the credibility of the government's commitment to such policies.                                                                                                                                                                                                                                            | Global economy  |
| Control of corruption                                                                     | The index for Control of Corruption captures perceptions of the extent to which public power is exercised for private gain, including both petty and grand forms of corruption, as well as the capture of the state by elites and private interests.                                                                                                                                                                                                                                                                                                              | Global economy  |
| Political stability                                                                       | The index of Political Stability and Absence of Violence/Terrorism measures perceptions of the likelihood that the government will be destabilized or overthrown by unconstitutional or violent means, including politically-motivated violence and terrorism. The index is an average of several other indexes from the Economist Intelligence Unit, the World Economic Forum, and the Political Risk Services, among others.                                                                                                                                    | Global economy  |
| Internet users                                                                            | Internet users are individuals who have used the Internet (from any location) in the last 3 months. The Internet can be used via a computer, mobile phone, personal digital assistant, games machine, digital TV etc.                                                                                                                                                                                                                                                                                                                                             | Global economy  |
| Mortality rate, under-5 (per 1,000 live births)                                           | The under-five mortality rate is the probability per 1,000 that a newborn baby will die before reaching age five if subject to age-specific mortality rates of the specified year                                                                                                                                                                                                                                                                                                                                                                                 | world data bank |
| Prevalence of HIV refers to the percentage of people ages 15-49 who are infected with HIV | Prevalence of HIV refers to the percentage of people ages 15-49 who are infected with HIV.                                                                                                                                                                                                                                                                                                                                                                                                                                                                        | Global economy  |
| Net official development assistance received (constant 2015 US\$)                         | Net official development assistance (ODA) consists of disbursements of loans made on concessional terms (net of repayments of principal) and grants by official agencies of the members of the Development Assistance Committee (DAC), by multilateral institutions, and by non-DAC countries to promote economic development and welfare in countries and territories in the DAC list of ODA recipients. It includes loans with a grant element of at least 25 percent (calculated at a rate of discount of 10 percent). Data are in constant 2014 U.S. dollars. | world data bank |
| Immunization, measles (% of children ages 12-23 months)                                   | Child immunization, measles, measures the percentage of children ages 12-23 months who received the measles vaccination before 12 months or at any time before the survey. A child is considered adequately immunized against measles after receiving one dose of vaccine.                                                                                                                                                                                                                                                                                        | world data bank |
| Labor force, female (% of total labor force)                                              | Female labor force as a percentage of the total shows the extent to which women are active in the labor force. Labor force comprises people ages 15 and older who supply labor for the production of goods and services during a specified period.                                                                                                                                                                                                                                                                                                                | world data bank |
| Mortality rate, adult, female (per 1,000 female adults)                                   | Adult mortality rate, female, is the probability of dying between the ages of 15 and 60—that is, the probability of a 15-year-old female dying before reaching age 60, if subject to age-specific mortality rates of the specified year between those ages.                                                                                                                                                                                                                                                                                                       | world data bank |
| Net bilateral aid flows from DAC donors, Total (current US\$)                             | Net bilateral aid flows from DAC donors are the net disbursements of official development assistance (ODA) or official aid from the members of the Development Assistance Committee (DAC). Net disbursements are gross disbursements of grants and loans minus repayments of principal on earlier loans.                                                                                                                                                                                                                                                          | World data bank |
| Net ODA received per capita (current US\$)                                                | Net official development assistance (ODA) per capita consists of disbursements of loans made on concessional terms (net of repayments of principal) and grants by official agencies of the members of the Development Assistance Committee (DAC), by multilateral institutions, and by non-DAC countries to promote economic development and welfare in countries and territories in the DAC list of ODA recipients; and is calculated by dividing net ODA received by the midyear population estimate                                                            | world data bank |

|                                                                          |                                                                                                                                                                                                                                                                                                                                                                                                     |                 |
|--------------------------------------------------------------------------|-----------------------------------------------------------------------------------------------------------------------------------------------------------------------------------------------------------------------------------------------------------------------------------------------------------------------------------------------------------------------------------------------------|-----------------|
| Urban population (% of total)                                            | Urban population refers to people living in urban areas as defined by national statistical offices. The data are collected and smoothed by the United Nations Population Division                                                                                                                                                                                                                   | world data bank |
| Vitamin A supplementation coverage rate (% of children ages 6-59 months) | Vitamin A supplementation refers to the percentage of children ages 6-59 months old who received at least two doses of vitamin A in the previous year.                                                                                                                                                                                                                                              | world data bank |
| Women's share of population ages 15+ living with HIV (%)                 | Prevalence of HIV is the percentage of people who are infected with HIV. The female rate is as a percentage of the total population ages 15+ who are living with HIV.                                                                                                                                                                                                                               | world data bank |
| Government expenditure on education, total (% of government expenditure) | General government expenditure on education (current, capital, and transfers) is expressed as a percentage of total general government expenditure on all sectors (including health, education, social services, etc.). It includes expenditure funded by transfers from international sources to the government. The general government usually refers to local, regional and central governments. | world data bank |
| People using safely managed sanitation services (% of the population)    | The percentage of people using improved sanitation facilities that are not shared with other households and where excreta are safely disposed of in situ or transported and treated offsite. Improved sanitation facilities include flush/pour flush to piped sewer systems, septic tanks or pit latrines: ventilated improved pit latrines, composting toilets or pit latrines with slabs.         | world data bank |
| Maternal mortality ratio (per 100,000 live births)                       | Maternal mortality ratio is the number of women who die from pregnancy-related causes while pregnant or within 42 days of pregnancy termination per 100,000 live births. The data are estimated with a regression model using information on the proportion of maternal deaths among non-AIDS deaths in women ages 15-49, fertility, birth attendants, and GDP                                      | world data bank |
| Fertility rate, total (births per woman)                                 | Total fertility rate represents the number of children that would be born to a woman if she were to live to the end of her childbearing years and bear children in accordance with age-specific fertility rates of the specified year.                                                                                                                                                              | world data bank |
